# Supplementary material
Source: bioRxiv or medRxiv preprint supplement (https://www.biorxiv.org/highwire/filestream/27626/field_highwire_adjunct_files/0/097642-1.pdf)
Supplement: Supplementary file [file 097642-1.pdf]

## Supplementary material

**Table S1** Population locations

| <b>Ecotype</b>   | <b>Latitude</b> | <b>Longitude</b> | <b>Population Code</b> | <b>Location</b>                    | <b>Variance Estimated</b> | <b>Mean Estimated</b> |
|------------------|-----------------|------------------|------------------------|------------------------------------|---------------------------|-----------------------|
| <b>Dune</b>      | -27.39845       | 153.453808       | D0                     | Stradbroke Island, Qld             |                           | X                     |
|                  | -28.783005      | 153.594018       | D1                     | Lennox Head, NSW                   | X                         | X                     |
|                  | -28.331043      | 153.571228       | D3                     | Cabarita Beach, NSW                | X                         | X                     |
|                  | -30.31275       | 153.137762       | D4                     | Coffs Harbour, NSW                 |                           | X                     |
| <b>Headland</b>  | -27.436047      | 153.545529       | H0                     | Stradbroke Island, Qld             |                           | X                     |
|                  | -28.813117      | 153.605319       | H1                     | Lennox Head, NSW                   | X                         | X                     |
|                  | -28.362519      | 153.574345       | H2                     | Cabarita Beach, NSW                | X                         | X                     |
|                  | -30.311827      | 153.145572       | H5                     | Coffs Harbour, NSW                 |                           | X                     |
| <b>Tableland</b> | -28.230508      | 153.135078       | T1                     | O'Reilly's Rainforest Retreat, Qld | X                         | X                     |
|                  | -30.488289      | 152.409297       | T5                     | New England National Park, NSW     |                           | X                     |
|                  | -28.293389      | 152.415917       | T9                     | Near Queen Mary Falls, Qld         | X                         | X                     |
|                  | -26.892234      | 151.619021       | T13                    | Bunya Mountains, Qld               |                           | X                     |
| <b>Woodland</b>  | -31.272984      | 149.070783       | W1                     | Warrumbungles National Park, NSW   |                           | X                     |
|                  | -27.479946      | 152.824709       | W2                     | Upper Brookfield, Qld              | X                         | X                     |
|                  | -30.290056      | 150.149194       | W3                     | Mt. Kaputar National Park, NSW     |                           | X                     |
|                  | -27.300911      | 152.28361        | W4                     | Esk, Qld                           | X                         | X                     |

**Table S2** Numbers of sires, dams and phenotyped offspring for each ecotype and population used to estimate genetic variance in the second glasshouse experiment.

| Ecotype   | Population | # Sires | # Dams | # Phenotyped Offspring |
|-----------|------------|---------|--------|------------------------|
| Dune      | D1         | 21      | 21     | 114                    |
|           | D3         | 22      | 22     | 122                    |
|           | Total      | 43      | 43     | 236                    |
| Headland  | H1         | 23      | 23     | 151                    |
|           | H2         | 21      | 20     | 121                    |
|           | Total      | 44      | 43     | 272                    |
| Tableland | T1         | 20      | 22     | 114                    |
|           | T9         | 17      | 17     | 108                    |
|           | Total      | 37      | 39     | 222                    |
| Woodland  | W2         | 21      | 23     | 118                    |
|           | W4         | 17      | 15     | 86                     |
|           | Total      | 38      | 38     | 204                    |

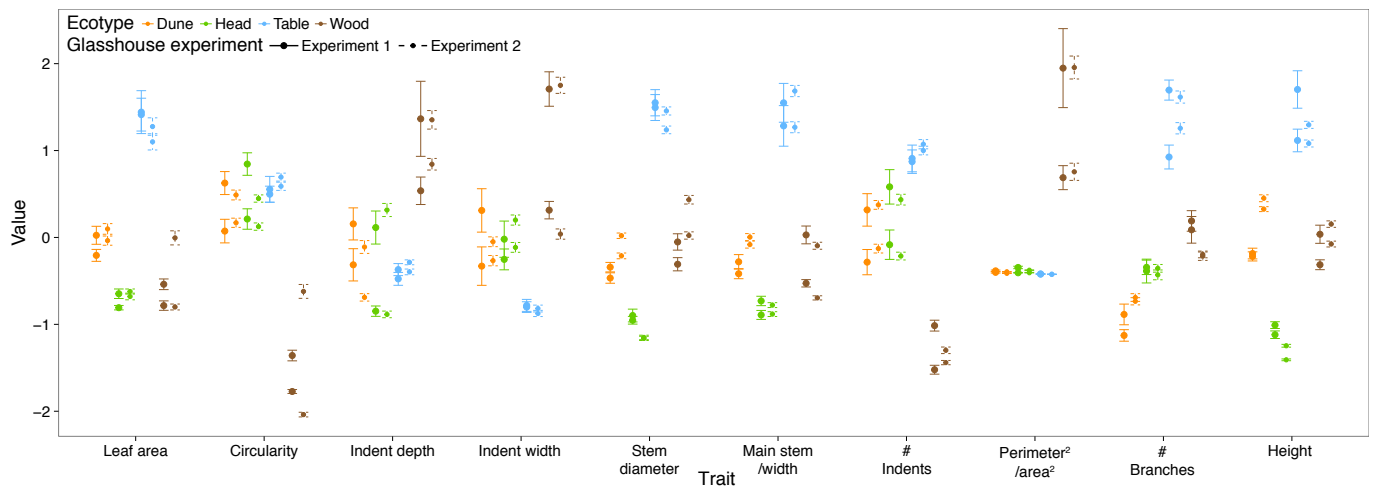

**Figure S3** Mean and standard error estimates for all ten traits for the eight populations grown in both glasshouse experiments. Replicate populations within ecotype are represented by dots with the same colour. There were only minor differences in mean between glasshouse experiments.

**Table S4** Posterior mean **G** matrices for each ecotype. Genetic correlations are presented below the diagonal.

| Traits           | 1      | 2                   | 3          | 4             | 5         | 6                                          | 7           | 8         | 9            | 10           |
|------------------|--------|---------------------|------------|---------------|-----------|--------------------------------------------|-------------|-----------|--------------|--------------|
|                  | Height | Stem Length / Width | # Branches | Stem Diameter | Leaf Area | Perimeter <sup>2</sup> / Area <sup>2</sup> | Circularity | # Indents | Indent Width | Indent Depth |
| <b>Dune</b>      |        |                     |            |               |           |                                            |             |           |              |              |
|                  | 1      | 2                   | 3          | 4             | 5         | 6                                          | 7           | 8         | 9            | 10           |
| 1                | 0.294  | 0.096               | 0.060      | 0.067         | 0.013     | -0.019                                     | 0.007       | 0.019     | -0.021       | -0.012       |
| 2                | 0.40   | 0.196               | 0.049      | 0.011         | 0.013     | 0.009                                      | 0.001       | 0.009     | -0.016       | 0.005        |
| 3                | 0.18   | 0.18                | 0.366      | 0.005         | 0.001     | -0.056                                     | 0.014       | 0.014     | 0.020        | -0.024       |
| 4                | 0.20   | 0.04                | 0.01       | 0.399         | 0.001     | -0.009                                     | 0.013       | 0.003     | 0.008        | -0.005       |
| 5                | 0.10   | 0.12                | 0.01       | 0.01          | 0.058     | -0.007                                     | 0.005       | 0.019     | -0.023       | 0.005        |
| 6                | -0.10  | 0.06                | -0.26      | -0.04         | -0.08     | 0.126                                      | -0.009      | -0.026    | -0.010       | 0.040        |
| 7                | 0.05   | 0.01                | 0.09       | 0.08          | 0.08      | -0.10                                      | 0.060       | 0.019     | -0.019       | -0.008       |
| 8                | 0.08   | 0.05                | 0.05       | 0.01          | 0.18      | -0.16                                      | 0.17        | 0.203     | -0.126       | -0.067       |
| 9                | -0.09  | -0.08               | 0.07       | 0.03          | -0.22     | -0.06                                      | -0.17       | -0.63     | 0.197        | 0.027        |
| 10               | -0.07  | 0.04                | -0.13      | -0.03         | 0.07      | 0.38                                       | -0.11       | -0.50     | 0.21         | 0.088        |
| <b>Headland</b>  |        |                     |            |               |           |                                            |             |           |              |              |
|                  | 1      | 2                   | 3          | 4             | 5         | 6                                          | 7           | 8         | 9            | 10           |
| 1                | 0.421  | 0.155               | -0.110     | 0.286         | 0.294     | -0.054                                     | 0.062       | -0.121    | -0.015       | 0.122        |
| 2                | 0.28   | 0.737               | 0.171      | 0.398         | 0.493     | -0.064                                     | 0.062       | -0.181    | 0.013        | 0.178        |
| 3                | -0.19  | 0.23                | 0.768      | -0.068        | -0.127    | -0.003                                     | -0.021      | 0.092     | -0.027       | -0.047       |
| 4                | 0.49   | 0.51                | -0.09      | 0.822         | 0.585     | -0.059                                     | 0.107       | -0.242    | -0.018       | 0.233        |
| 5                | 0.45   | 0.57                | -0.14      | 0.64          | 1.003     | -0.097                                     | 0.112       | -0.310    | 0.019        | 0.276        |
| 6                | -0.31  | -0.28               | -0.01      | -0.24         | -0.36     | 0.071                                      | -0.020      | 0.020     | -0.009       | -0.010       |
| 7                | 0.33   | 0.25                | -0.08      | 0.41          | 0.39      | -0.26                                      | 0.083       | -0.024    | -0.019       | 0.038        |
| 8                | -0.40  | -0.45               | 0.22       | -0.57         | -0.66     | 0.16                                       | -0.18       | 0.219     | -0.063       | -0.123       |
| 9                | -0.06  | 0.04                | -0.08      | -0.05         | 0.05      | -0.08                                      | -0.17       | -0.34     | 0.158        | -0.003       |
| 10               | 0.45   | 0.49                | -0.13      | 0.61          | 0.66      | -0.09                                      | 0.31        | -0.63     | -0.02        | 0.176        |
| <b>Tableland</b> |        |                     |            |               |           |                                            |             |           |              |              |
|                  | 1      | 2                   | 3          | 4             | 5         | 6                                          | 7           | 8         | 9            | 10           |
| 1                | 0.298  | 0.149               | 0.024      | 0.205         | 0.012     | -0.029                                     | 0.011       | 0.005     | 0.005        | 0.027        |
| 2                | 0.45   | 0.360               | 0.021      | 0.163         | 0.068     | -0.027                                     | 0.076       | -0.025    | -0.006       | 0.106        |
| 3                | 0.09   | 0.07                | 0.227      | 0.019         | -0.018    | 0.004                                      | -0.029      | -0.008    | 0.033        | -0.074       |
| 4                | 0.43   | 0.31                | 0.05       | 0.771         | -0.029    | -0.031                                     | -0.025      | 0.065     | -0.018       | -0.045       |
| 5                | 0.05   | 0.24                | -0.08      | -0.07         | 0.216     | -0.029                                     | 0.106       | -0.035    | -0.101       | 0.161        |
| 6                | -0.18  | -0.16               | 0.03       | -0.12         | -0.22     | 0.083                                      | -0.020      | -0.015    | -0.002       | 0.001        |
| 7                | 0.04   | 0.25                | -0.12      | -0.06         | 0.46      | -0.14                                      | 0.250       | -0.033    | -0.066       | 0.185        |
| 8                | 0.02   | -0.10               | -0.04      | 0.18          | -0.18     | -0.13                                      | -0.16       | 0.167     | -0.069       | -0.132       |
| 9                | 0.02   | -0.02               | 0.13       | -0.04         | -0.40     | -0.01                                      | -0.24       | -0.31     | 0.294        | -0.080       |
| 10               | 0.07   | 0.25                | -0.22      | -0.07         | 0.49      | 0.00                                       | 0.53        | -0.46     | -0.21        | 0.496        |
| <b>Woodland</b>  |        |                     |            |               |           |                                            |             |           |              |              |
|                  | 1      | 2                   | 3          | 4             | 5         | 6                                          | 7           | 8         | 9            | 10           |
| 1                | 0.173  | 0.029               | -0.011     | 0.015         | 0.014     | 0.00                                       | 0.001       | -0.027    | 0.017        | 0.00         |
| 2                | 0.21   | 0.106               | 0.015      | 0.017         | -0.009    | 0.024                                      | -0.006      | -0.025    | 0.036        | 0.004        |
| 3                | -0.05  | 0.09                | 0.278      | 0.008         | -0.031    | -0.027                                     | -0.009      | 0.061     | -0.010       | -0.026       |
| 4                | 0.10   | 0.14                | 0.04       | 0.135         | 0.017     | -0.037                                     | 0.017       | 0.022     | -0.019       | -0.022       |
| 5                | 0.12   | -0.10               | -0.20      | 0.16          | 0.084     | -0.028                                     | 0.037       | -0.013    | -0.022       | -0.012       |
| 6                | 0.00   | 0.18                | -0.13      | -0.25         | -0.24     | 0.162                                      | -0.016      | -0.072    | 0.035        | 0.033        |
| 7                | 0.01   | -0.06               | -0.06      | 0.15          | 0.41      | -0.13                                      | 0.095       | -0.034    | -0.048       | -0.018       |
| 8                | -0.13  | -0.15               | 0.22       | 0.12          | -0.09     | -0.34                                      | -0.21       | 0.269     | -0.053       | -0.045       |
| 9                | 0.11   | 0.28                | -0.05      | -0.13         | -0.20     | 0.22                                       | -0.40       | -0.26     | 0.151        | 0.034        |
| 10               | 0.00   | 0.04                | -0.16      | -0.20         | -0.14     | 0.27                                       | -0.19       | -0.28     | 0.29         | 0.094        |

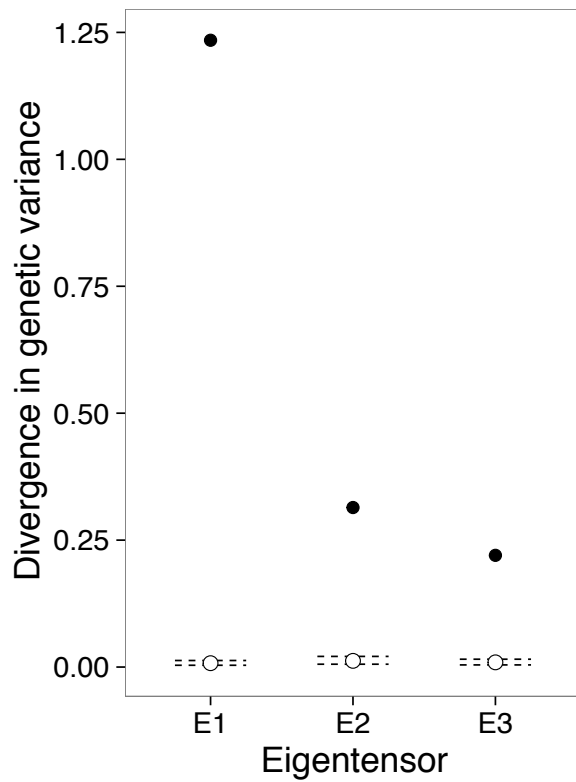

**Figure S5** Significant variation explained by the covariance tensor on **G**. Unfilled circles represent the tensor conducted on the randomised **G** matrices, with dashed lines showing the 95% HPD intervals. Observed eigenvalues of **S** (filled circles) were higher than the random distribution, suggesting that all three eigentensors explained more divergence in genetic variation than expected by sampling error.

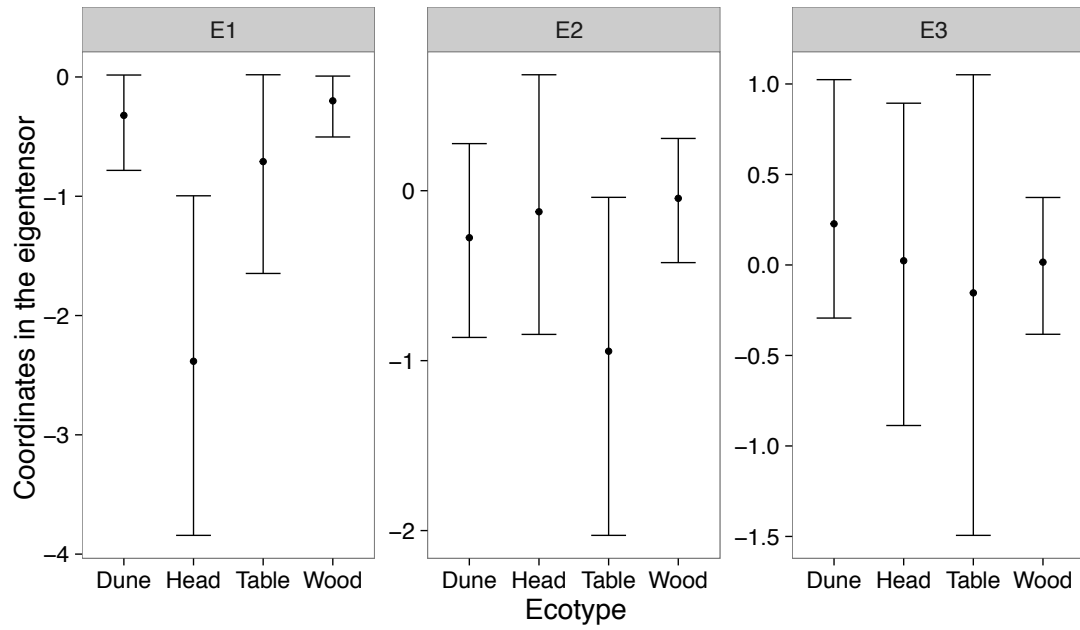

**Figure S6** Coordinates of each ecotype **G** in the space of the eigentensor. Only the first eigentensor detected significant differences between ecotypes. Error bars are 95% HPD intervals.

**Table S7** Full covariance tensor analysis of ecotype **G**.

| Eigen-tensor | $\alpha$<br>(Proportion) | Eigen-vector | $\lambda$<br>(Proportion) | Architecture |                     |            |               | Leaf Morphology |                                            |             |           |              |              |
|--------------|--------------------------|--------------|---------------------------|--------------|---------------------|------------|---------------|-----------------|--------------------------------------------|-------------|-----------|--------------|--------------|
|              |                          |              |                           | Height       | Stem Length / Width | # Branches | Stem Diameter | Leaf Area       | Perimeter <sup>2</sup> / Area <sup>2</sup> | Circularity | # Indents | Indent Width | Indent Depth |
| Tensor 1     | 1.23 (0.38)              | $e_{1,1}$    | -0.95 (0.61)              | -0.24        | -0.44               | 0.04       | -0.50         | -0.62           | 0.07                                       | -0.08       | 0.22      | -0.01        | -0.21        |
|              |                          | $e_{1,2}$    | -0.27 (0.17)              | 0.24         | -0.50               | -0.82      | 0.07          | 0.12            | -0.02                                      | 0.02        | -0.06     | 0.04         | 0.01         |
|              |                          | $e_{1,3}$    | -0.08 (0.05)              | 0.47         | -0.15               | 0.18       | 0.53          | -0.58           | 0.05                                       | 0.14        | -0.01     | -0.22        | 0.21         |
|              |                          | $e_{1,4}$    | 0.08 (0.05)               | 0.02         | -0.02               | -0.01      | 0.25          | 0.15            | -0.41                                      | -0.10       | 0.72      | -0.28        | -0.37        |
|              |                          | $e_{1,5}$    | -0.06 (0.04)              | 0.09         | -0.70               | 0.52       | 0.03          | 0.46            | 0.12                                       | -0.04       | -0.03     | 0.00         | 0.05         |
|              |                          | $e_{1,6}$    | -0.04 (0.02)              | 0.76         | 0.15                | 0.09       | -0.59         | 0.08            | -0.17                                      | 0.04        | 0.08      | -0.02        | 0.02         |
|              |                          | $e_{1,7}$    | 0.03 (0.02)               | -0.24        | -0.11               | 0.02       | -0.16         | 0.02            | -0.56                                      | 0.50        | -0.30     | -0.47        | 0.17         |
|              |                          | $e_{1,8}$    | 0.02 (0.01)               | 0.02         | -0.11               | 0.10       | 0.11          | -0.15           | -0.68                                      | -0.30       | -0.17     | 0.59         | 0.07         |
|              |                          | $e_{1,9}$    | 0.02 (0.01)               | 0.14         | 0.01                | 0.07       | 0.11          | -0.03           | 0.00                                       | 0.09        | -0.47     | -0.02        | -0.86        |
|              |                          | $e_{1,10}$   | 0 (0)                     | 0.01         | 0.02                | -0.04      | -0.05         | -0.01           | -0.06                                      | -0.78       | -0.29     | -0.54        | 0.08         |
| Tensor 2     | 0.31 (0.10)              | $e_{2,1}$    | -0.78 (0.36)              | -0.34        | -0.20               | -0.05      | -0.87         | 0.17            | 0.02                                       | 0.08        | -0.14     | -0.01        | 0.19         |
|              |                          | $e_{2,2}$    | -0.41 (0.19)              | 0.19         | 0.30                | -0.02      | 0.08          | 0.08            | -0.04                                      | 0.46        | -0.01     | -0.30        | 0.75         |
|              |                          | $e_{2,3}$    | 0.39 (0.18)               | 0.14         | -0.05               | -0.82      | 0.13          | 0.41            | 0.04                                       | -0.02       | -0.32     | 0.13         | -0.03        |
|              |                          | $e_{2,4}$    | 0.21 (0.1)                | 0.11         | -0.32               | -0.48      | -0.11         | -0.72           | 0.07                                       | 0.10        | 0.27      | -0.18        | 0.05         |
|              |                          | $e_{2,5}$    | -0.13 (0.06)              | 0.64         | 0.48                | -0.01      | -0.43         | -0.13           | -0.09                                      | 0.06        | 0.02      | 0.31         | -0.21        |
|              |                          | $e_{2,6}$    | -0.09 (0.04)              | 0.17         | 0.14                | -0.06      | -0.15         | 0.25            | 0.09                                       | -0.25       | 0.17      | -0.83        | -0.28        |
|              |                          | $e_{2,7}$    | -0.05 (0.02)              | 0.28         | -0.14               | 0.08       | -0.04         | -0.11           | -0.07                                      | -0.78       | -0.21     | 0.02         | 0.48         |
|              |                          | $e_{2,8}$    | 0.04 (0.02)               | 0.05         | -0.19               | -0.10      | -0.02         | 0.31            | -0.63                                      | -0.06       | 0.66      | 0.13         | 0.09         |
|              |                          | $e_{2,9}$    | 0.03 (0.01)               | -0.10        | 0.21                | -0.09      | -0.02         | 0.16            | 0.69                                       | -0.20       | 0.55      | 0.25         | 0.19         |
|              |                          | $e_{2,10}$   | -0.01 (0)                 | 0.54         | -0.65               | 0.27       | -0.01         | 0.25            | 0.31                                       | 0.25        | 0.01      | 0.03         | -0.03        |
| Tensor 3     | 0.22 (0.07)              | $e_{3,1}$    | -0.74 (0.36)              | -0.04        | -0.18               | 0.13       | 0.02          | -0.46           | 0.02                                       | -0.34       | 0.32      | 0.10         | -0.72        |
|              |                          | $e_{3,2}$    | 0.58 (0.28)               | -0.48        | -0.49               | -0.58      | -0.43         | -0.04           | 0.10                                       | -0.03       | -0.06     | 0.02         | 0.04         |
|              |                          | $e_{3,3}$    | 0.2 (0.1)                 | -0.58        | 0.05                | 0.71       | -0.37         | 0.11            | -0.01                                      | -0.01       | -0.05     | 0.04         | 0.07         |
|              |                          | $e_{3,4}$    | -0.19 (0.09)              | 0.07         | 0.08                | -0.02      | 0.01          | -0.04           | 0.11                                       | -0.31       | -0.54     | 0.76         | 0.01         |
|              |                          | $e_{3,5}$    | 0.11 (0.05)               | 0.39         | 0.43                | -0.10      | -0.78         | 0.01            | 0.09                                       | -0.12       | 0.09      | -0.07        | -0.09        |
|              |                          | $e_{3,6}$    | -0.1 (0.05)               | -0.04        | -0.01               | -0.08      | 0.06          | 0.81            | -0.05                                      | -0.15       | -0.12     | -0.09        | -0.52        |
|              |                          | $e_{3,7}$    | 0.07 (0.03)               | 0.52         | -0.73               | 0.32       | -0.22         | 0.13            | -0.14                                      | 0.04        | -0.03     | 0.06         | 0.09         |
|              |                          | $e_{3,8}$    | -0.06 (0.03)              | 0.01         | -0.06               | 0.03       | 0.10          | 0.03            | 0.09                                       | -0.85       | -0.01     | -0.36        | 0.36         |
|              |                          | $e_{3,9}$    | -0.03 (0.01)              | 0.05         | -0.04               | 0.09       | -0.02         | -0.28           | 0.18                                       | 0.13        | -0.73     | -0.51        | -0.25        |
|              |                          | $e_{3,10}$   | 0.01 (0)                  | -0.06        | 0.09                | -0.10      | -0.07         | -0.13           | -0.95                                      | -0.11       | -0.18     | -0.05        | -0.02        |
